# Supplementary material for: Synthetic development of cell-permeable polymer colloids decorated with nanocrystal imaging probes optimized for cell tracking
Source: Royal Society of Chemistry journal article supplement (doi:10.1039/c2sc20206a), 2012-01-01
Supplement: c2sc20206a.pdf [file c2sc20206a.pdf]

Electronic Supplementary Information  
for  
**Synthetic Development of Cell-Permeable Polymer Colloids Decorated with  
Nanocrystal Imaging Probes Optimized for Cell Tracking**

Dev S. Chahal, Harvind S. Chahal, Andrea R. Bayles, Emma M. Rudié and Brett A.  
Helms\*

## MATERIALS AND METHODS

*Materials.* 2-(*N,N*-diethylamino)ethyl 2-methacrylate (DMAEMA) (Aldrich, inhibitor removed using a short path column of basic alumina), 2-aminoethyl 2-methacrylate hydrochloride (AEMA) (Aldrich), poly(ethylene glycol) dimethacrylate (PEGDMA) (MW ~ 330), ammonium persulfate (APS) (Aldrich) and 2-ethyl-2-thiopseudourea hydrobromide (Aldrich) were used as supplied unless described otherwise. Anhydrous solvents of the highest possible purity were used for all chemical transformations. Buffers and media were purchased from Sigma-Aldrich or prepared from biochemical grade salts and ultra-high purity water (Millipore) and sterile-filtered prior to use. QD 605 ITK Streptavidin conjugates (Life Tech) were used along with 4',6-diamidino-2-phenylindole (DAPI) (Life Tech), and LysoTracker® Green (Life Tech) for confocal fluorescence microscopy experiments. Concentrations of nanocrystals were estimated using the procedure of Peng *et al*<sup>1</sup>. HeLa cells (ATCC# CCL-2) were obtained from ATCC (Manassas, VA) and grown according to guidelines.

### *Methods*

**Synthesis of amine-terminated polymer colloids.** The chemical synthesis of the small library of guanidinylated colloids reported in this study builds greater molecular complexity from an approach we have detailed elsewhere<sup>2</sup> or have submitted<sup>3</sup> concurrently with this manuscript. Briefly, high-purity water (10 mL) containing DMAEMA (1.00 mL, 5 mmol) and PEGDMA (10 mg, 30 µmol) was degassed at 70 °C

before introducing APS in degassed water (100  $\mu\text{L}$ ). After 3 h, a solution of AEMA (40 mg, 241  $\mu\text{mol}$ ) in degassed water (50  $\mu\text{L}$ ) was then added to grow the amine-containing shell. After an additional 1.5 h, the reaction mixture was cooled to 25  $^{\circ}\text{C}$  prior to purification by tangential flow filtration (0.05  $\mu\text{m}$  cutoff, MicroKos TFF filters, Spectrum Laboratories) against Dulbecco's Phosphate Buffered Saline (PBS, pH 7.4). The materials were then stored at 4  $^{\circ}\text{C}$  at a concentration of  $\sim 50 \text{ mg mL}^{-1}$ . The amount of APS used in the reaction scheme was varied according to the desired particle size: 10 mg (44  $\mu\text{mol}$ ) for large particles ( $d = 305 \text{ nm}$ ), 20 mg (88  $\mu\text{mol}$ ) for medium particles ( $d = 150 \text{ nm}$ ), and 40 mg (172  $\mu\text{mol}$ ) for small particles ( $d = 125 \text{ nm}$ ). Detailed characterization appears elsewhere<sup>3</sup>.

**Synthesis of guanidinylated polymer colloids.** Guanidinylation of the amine terminated colloids (1 mL, 50  $\text{mg mL}^{-1}$ ) was carried out in a Shlenk tube at 70  $^{\circ}\text{C}$  in degassed PBS containing 2-ethyl-2-thiopseudourea hydrobromide (93 mg, 0.50 mmol). During the course of the reaction, the evolution of ethyl mercaptan (*caution: toxic*) drives the reaction and thus should be conducted in a well-ventilated fume hood under a positive pressure of an inert carrier gas (e.g.,  $\text{N}_2$ ). After 3 h, the reaction mixture was cooled to 25  $^{\circ}\text{C}$  prior to purification by tangential flow filtration (0.05  $\mu\text{m}$  cutoff, MicroKos TFF filters, Spectrum Laboratories) against Dulbecco's Phosphate Buffered Saline (PBS, pH 7.4). The materials were then stored at 4  $^{\circ}\text{C}$  at a concentration of  $\sim 5 \text{ mg mL}^{-1}$ . FT-IR spectra indicating successful guanidinylation (Figure S1) were acquired for colloids deposited from stock dispersions of polymer vectors in PBS diluted 1:10 with MeOH (Perkin Elmer).

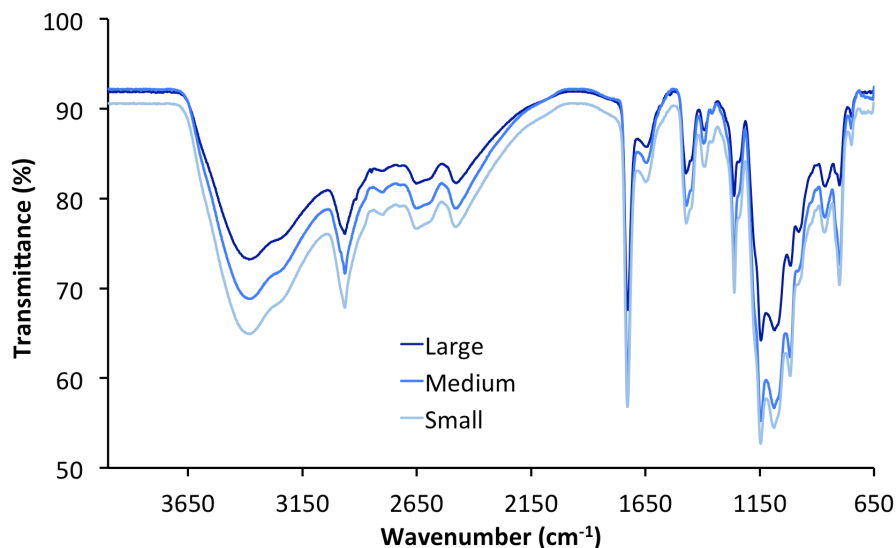

**Fig. S1.** FT-IR data for guanidinylated colloids.

**Characterization of vector sizes by DLS.** DLS measurements were made using a Malvern Zetasizer Nano ZS. For pH studies, core-shell polymer vectors were suspended in PBS at pH 7.4 or acetate buffer at pH 5.5 (1 mg mL<sup>-1</sup>) and equilibrated at 37 °C for 10 minutes prior to analysis. These data are summarized in Table S1. For temperature studies, the vectors were again suspended in PBS (pH 7.4) and size measurements were taken as temperature varied. Specifically, a standard-operating procedure was created using Malvern Zetasizer software that increased or decreased the operating temperature in the cuvette by 1 °C every 2 minutes. Zeta potential measurements were performed by diluting one of the above mixtures 1:10 in MilliQ water. Data were collected until a count of 10<sup>5</sup> was reached.

**TABLE S1.** DLS measurements of guanidinylated colloidal polymer vectors. The diameter ratios ( $d_{\text{pH}=5.5} / d_{\text{pH}=7.4}$ ) and volume ratios ( $V_{\text{pH}=5.5} / V_{\text{pH}=7.4}$ ) are also given.

| Vector | Diameter (nm) at 37 °C |        | Diameter Ratio | Volume Ratio |
|--------|------------------------|--------|----------------|--------------|
|        | pH 7.4                 | pH 5.5 |                |              |
| Small  | 150                    | 461    | 3.1            | 29           |
| Medium | 175                    | 350    | 2.0            | 8.0          |
| Large  | 335                    | 650    | 1.9            | 7.3          |

**Cell Viability Assays.** The cytotoxicity of PDMAEMA-co-PEGDMA-*graft*-poly(guanidiny ethyl methacrylate-co-PAEMA) cationic polymer vectors in the presence of SA-605-QDs (0 to 5 nM) was evaluated using a MTS colorimetric assay<sup>2,3</sup> (CellTiter 96 AQueous Non-Radioactive Cell Proliferation Assay, Promega). HeLa cells ( $5 \times 10^4$ ) were inoculated into a 96-well tissue culture plate (FALCON) with 100  $\mu$ L of complete media (Dulbecco's Modified Eagle Medium supplemented with Fetal Bovine Serum, 10% v/v) and incubated for 24 h at 37 °C. The media was subsequently exchanged for complete media containing the polymer vector ( $c = 3.125 - 400 \mu\text{g mL}^{-1}$ ). The cells were incubated for up to 24 h at 37 °C and analyzed according to the manufacturer's instructions using a SpectraMax Plus 384 Spectrophotometer (Molecular Devices).

**Flow Cytometry.** HeLa cells were cultured in DMEM-FBS complete medium in 6-well plates (FALCON) and were labeled with SA-605-QDs as described above and similar to our previous protocols reported elsewhere<sup>2,3</sup>. The labeled cells were washed with D-PBS (3 x 1 mL) and harvested with 0.25% trypsin/EDTA (Sigma). DMEM-FBS complete medium (2 mL) was used to inactivate the trypsin and the labeled cells were pelleted by centrifugation at 1000 rpm for 8 minutes, discarding the supernatant. The resulting pellets were washed by resuspending the cells in D-PBS containing 1% w/w BSA (2 mL) and subsequent centrifugation. The pelleted cells were finally resuspended in PBS/1% BSA prior to analysis. Flow cytometry was performed on a BD Biosciences FACS Aria Flow Cytometer. Fluorescence signals from individual labeled cells (10,000 events in total) were obtained by exciting at  $\lambda_{\text{ex}} = 405 \text{ nm}$  and monitoring the emission using a 605/40 band-pass filter. Data were acquired using FACSDiva v. 6.0 and processed using FloJo v. 7.5.

**In Vitro Cell Imaging.** 605-SA-QD delivery and subcellular localization over time was visualized using confocal fluorescence microscopy. For these experiments, HeLa cells were plated at a concentration of 500,000 cells/well (250,000 cells/mL) in a 6 well plate containing 22 x 22 mm glass substrates (OD 1.5, VWR). Cells were allowed to seed for 24 h. SA-605-QDs were allowed to bind to the guanidinylated vectors in PBS for up to 24 h at 4 °C on a rotating carousel prior to introduction to cells. Cells were incubated

with SA-605-QDs (0.5 to 5 nM) bound to the guanidinylated polymer vectors ( $25 \mu\text{g mL}^{-1}$ ) at  $37^\circ\text{C}$  for 1 h in DMEM-FBS complete medium. The cells were then washed 2x with PBS and subsequently incubated at  $37^\circ\text{C}$  in DMEM-FBS complete medium with the delivery process arrested at different times (0 h, 4 h, 8 h, etc) post-incubation. For endolysosomal co-localization studies, cells were incubated with LysoTracker® Green (75 nM) 1 h before the experimental endpoint. At the end of the designated time point, the media was replaced and cells were exposed to DAPI (400 nM) for 20 minutes. Cells were then further washed with PBS to remove the DAPI and imaged directly, or otherwise treated with freshly made cell fixing solution (2% v/v formaldehyde and 2.5% v/v glutaraldehyde in PBS) for 20 minutes. The fixing solution was then aspirated and the cells were washed 2x with PBS. The glass squares were removed from well plates and placed cell-side down onto glass slides (VWR) coated with Vectashield (Vectashield Corp, Burlingame, CA). Slides were sealed with clear nail polish and left to dry before imaging. Confocal fluorescence imaging of labeled and fixed cells were acquired using a Zeiss 710 Laser Scanning Confocal Microscope equipped with spectral detector, using a Plan-Apochromat 40x/1.40 oil objective. DAPI and SA-605-QDots were excited at  $\lambda = 405 \text{ nm}$  using a HeNe laser, LysoTracker® Green and DiO was excited at  $\lambda = 488 \text{ nm}$  using an Argon laser. Acquired images were processed identically with Zeiss ZEN software.

#### REFERENCES:

- 1 W. W. Yu, L. Qu, W. Guo, X. Peng, *Chem. Mater.* 2003, **15**, 2854–2860.
- 2 A. R. Bayles, H. S. Chahal, D. S. Chahal, C. P. Goldbeck, B. E. Cohen, B. A. Helms, *Nano Lett.*, 2010, **10**, 4086–4092.
- 3 H. S. Chahal, A. R. Bayles, D. S. Chahal, P. M. McBride, B. A. Helms, *Adv. Funct. Mater.*, submitted.
